# Supplementary material for: Profiles of People Who Carried Out Late Primary Vaccination against COVID-19 in the Region of Murcia
Source: MDPI journal article supplement (doi:10.3390/vaccines11040732), 2023-03-25
Supplement: s1 [file s1]

**Table S1.** COVID-19 telephone questionnaire.

| Question                                                                                       | Possible answers                                                                                   |
|------------------------------------------------------------------------------------------------|----------------------------------------------------------------------------------------------------|
| <b>Part 1. Socio-demographic variables</b>                                                     |                                                                                                    |
| Indicate your sex                                                                              | Man/Woman                                                                                          |
| Indicate the Autonomous Community you live in                                                  | Murcia/Others                                                                                      |
| Indicate your age                                                                              | Age in years                                                                                       |
| Were you born in Spain?                                                                        | Yes/No                                                                                             |
| Were your parents born in Spain?                                                               | Yes/No                                                                                             |
| In case of a negative answer to the previous question, indicate your parents' birth country    | Occidental Europe/Eastern Europe/North Africa/Central and Southern Africa/Latin America/Asia/Other |
| Indicate your education level                                                                  | No studies/Primary studies/Secondary studies/Higher education                                      |
| Indicate your employment situation                                                             | Active/Retired/Student/Unemployed                                                                  |
| Indicate your marital status                                                                   | Single/Married/Divorced/Widower                                                                    |
| Do you live or usually spend time with vulnerable people?                                      | Yes/No                                                                                             |
| In case of an affirmative answer, has this vulnerable person been vaccinated against COVID-19? | Yes/No                                                                                             |
| Do you have children?                                                                          | Yes/No                                                                                             |

|                                                                                                                        |              |
|------------------------------------------------------------------------------------------------------------------------|--------------|
| In case of an affirmative answer, did they receive all the vaccines covered by the insurance?                          | Yes/No       |
| In addition to vaccines covered by the insurance, did your child get any of the vaccines not covered by the insurance? | Yes/No       |
| Did you get the vaccine against flu in the present campaign 2021-2022?                                                 | Yes/No       |
| Did you get the vaccine against flu in the present campaign 2020-2021?                                                 | Yes/No       |
| <b>Part 2. COVID-19 variables</b>                                                                                      |              |
| Have you had COVID-19?                                                                                                 | Yes/No       |
| In case you had COVID-19, was it before or after the first shot of the vaccine?                                        | Before/After |
| In case you had COVID-19, did you need hospitalisation?                                                                | Yes/No       |
| In case you had COVID-19, did you require the Intensive Care Unit?                                                     | Yes/No       |
| In case you had COVID-19, do you have any sequels?                                                                     | Yes/No       |
| In case you had COVID-19, were you confined because of it?                                                             | Yes/No       |
| Have any of your relatives or friends had COVID-19?                                                                    | Yes/No       |
| If any of your relatives or friends had COVID-19, did they require hospitalization?                                    | Yes/No       |

|                                                                                                                   |                                                                                                         |
|-------------------------------------------------------------------------------------------------------------------|---------------------------------------------------------------------------------------------------------|
| If any of your relatives or friends had COVID-19, did they require the Intensive Care Unit?                       | Yes/No                                                                                                  |
| If any of your relatives or friends had COVID-19, do they have sequels?                                           | Yes/No                                                                                                  |
| If any of your relatives or friends had COVID-19, did they survive?                                               | Yes/No                                                                                                  |
| From the beginning of the pandemic, have you stopped hugging and kissing your relatives or friends at any moment? | Yes/No                                                                                                  |
| If you stopped hugging and kissing, have you resumed kissing and hugging?                                         | Yes/No                                                                                                  |
| In case of an affirmative answer to the previous question, indicate when you resumed kissing and hugging          | Since I got the vaccine/Since they got the vaccine/Since the incidence of COVID decreased/Other reasons |
| <b>Part 3. Self-perceived risk</b>                                                                                |                                                                                                         |
| COVID-19 vaccine makes me feel safer at work                                                                      | Likert scale from 1 to 5, where 1 means "strongly disagree" and 5 means "strongly agree"                |
| COVID-19 vaccine helps me protect my family                                                                       |                                                                                                         |
| COVID-19 vaccine makes me feel more comfortable with my family                                                    |                                                                                                         |
| COVID-19 vaccine will decrease my risk of getting COVID-19                                                        |                                                                                                         |
| COVID vaccine will decrease my risk of hospitalization and severe COVID, even if I get infected                   |                                                                                                         |

| Part 4. Vaccine security perception                                                            |                                                                                          |
|------------------------------------------------------------------------------------------------|------------------------------------------------------------------------------------------|
| I believe that approved COVID-19 vaccines are safe                                             | Likert scale from 1 to 5, where 1 means "strongly disagree" and 5 means "strongly agree" |
| I believe that COVID-19 vaccines have similar effects to other approved vaccines               |                                                                                          |
| I believe that the accelerated development of COVID-19 vaccines has decreased their safety     |                                                                                          |
| I trust the work on approval and regulation of the drug regulatory agencies                    |                                                                                          |
| I trust Health Authorities' recommendations                                                    |                                                                                          |
| I believe that COVID vaccine benefits are greater than the risks                               |                                                                                          |
| Part 5. Fear of COVID-19 Scale (FCV-19S)                                                       |                                                                                          |
| I am most afraid of COVID-19                                                                   | Likert scale from 1 to 5, where 1 means "strongly disagree" and 5 means "strongly agree" |
| It makes me feel uncomfortable when I think about COVID-19                                     |                                                                                          |
| My hands become clammy when I think about COVID-19                                             |                                                                                          |
| I am afraid of losing my life because of COVID-19                                              |                                                                                          |
| I become nervous and anxious and when watching news and stories about COVID-19 on social media |                                                                                          |

|                                                                                                  |                                                                                                                                                                                                                                                                                                                                                            |
|--------------------------------------------------------------------------------------------------|------------------------------------------------------------------------------------------------------------------------------------------------------------------------------------------------------------------------------------------------------------------------------------------------------------------------------------------------------------|
| I cannot sleep because I am worrying about getting COVID-19                                      |                                                                                                                                                                                                                                                                                                                                                            |
| My heart races or palpitates when I think about getting COVID-19                                 |                                                                                                                                                                                                                                                                                                                                                            |
| Part 6. Reasons for not being vaccinated before                                                  |                                                                                                                                                                                                                                                                                                                                                            |
| Indicate which of the following reasons made you decide not to get the vaccine until now         | <p>Possible adverse events</p> <p>I don't think vaccines protect against COVID</p> <p>I had medical advice against vaccination</p> <p>I preferred to wait until many people were vaccinated to be sure vaccines are safe</p> <p>I don't believe in COVID-19 vaccines because they have been developed too quickly</p> <p>I don't believe in government</p> |
| Part 7. Reasons for finally getting vaccinated                                                   |                                                                                                                                                                                                                                                                                                                                                            |
| The need for a COVID-19 certificate in bars and restaurants has been a reason to get the vaccine | Yes/No                                                                                                                                                                                                                                                                                                                                                     |
| Indicate final reason that made you get the COVID-19 vaccine                                     | <p>To get the certificate</p> <p>To be able to travel</p> <p>Because my employer recommended me to do it</p> <p>Because I was afraid of getting COVID-19</p> <p>Because I was afraid of transmitting COVID-19 to relatives and friends</p> <p>Other reasons</p>                                                                                            |

|                                                                                             |                                                                                                                                                                                |
|---------------------------------------------------------------------------------------------|--------------------------------------------------------------------------------------------------------------------------------------------------------------------------------|
| Have you received full primary vaccination (two shots or one shot plus previous infection)? | Yes/No                                                                                                                                                                         |
| In case of a negative answer to the previous question, could you indicate the reason        | <p>One shot is enough</p> <p>I had adverse effects with the first shot</p> <p>People close to me had adverse effects when receiving full primary vaccination</p> <p>Others</p> |

**Table S2.** Socio-demographic data obtained from the first part of the survey.

|                                    | Variable               | n(%)<br>Mean (SD)    | n(%)<br>Mean (SD) |                  | p<br>Chi2/<br>StudentT/<br>Mann-<br>Whitney |
|------------------------------------|------------------------|----------------------|-------------------|------------------|---------------------------------------------|
|                                    |                        | Total<br>sample: 338 | Men               | Women            |                                             |
| Socio-<br>demographic<br>variables | Gender                 |                      | 181<br>(53.55)    | 157<br>(46.45)   |                                             |
|                                    | Man                    |                      |                   |                  |                                             |
|                                    | Woman                  |                      |                   |                  |                                             |
|                                    | Autonomous Community   |                      |                   |                  | 0.678                                       |
|                                    | Murcia                 | 328 (97.04%)         | 175<br>(53.35)    | 153<br>(46.65)   |                                             |
|                                    | Others                 | 10 (2.96%)           | 6 (60.00)         | 4 (40.00)        |                                             |
|                                    | Age                    | 36.57 (14.09)        | 35.40<br>(14.10)  | 37.92<br>(13.99) | 0.0501                                      |
|                                    | Under 18               |                      |                   |                  | 0.847                                       |
|                                    | No                     | 331 (97.93%)         | 177<br>(53.47)    | 154<br>(46.53)   |                                             |
|                                    | Yes                    | 7 (2.07%)            | 4 (57.14)         | 3 (42.86)        |                                             |
|                                    | Spaniard               |                      |                   |                  | 0.157                                       |
|                                    | No                     | 184 (54.44%)         | 105<br>(57.07)    | 79 (42.93)       |                                             |
|                                    | Yes                    | 154 (45.56%)         | 76 (49.35)        | 78 (50.65)       |                                             |
|                                    | Spanish parents        |                      |                   |                  | 0.068                                       |
|                                    | No                     | 188 (55.62%)         | 109<br>(57.98)    | 79 (42.02)       |                                             |
|                                    | Yes                    | 150 (44.38%)         | 72 (48.00)        | 78 (52.00)       |                                             |
|                                    | Parents' birth country |                      |                   |                  | 0.002*                                      |
|                                    | Occidental Europe      | 5 (2.62%)            | 3 (60.00)         | 2 (40.00)        |                                             |

|                                   |              |             |             |         |
|-----------------------------------|--------------|-------------|-------------|---------|
| Eastern Europe                    | 18 (9.42%)   | 3 (16.67)   | 15 (83.33)  |         |
| North Africa                      | 83 (43.46%)  | 55 (66.27)  | 28 (33.73)  |         |
| Central and southern Africa       | 15 (7.85%)   | 13 (86.67)  | 2 (13.33)   |         |
| Central and South America         | 57 (29.84%)  | 32 (56.14)  | 25 (43.86)  |         |
| Asia                              | 6 (3.14%)    | 3 (50.00)   | 3 (50.00)   |         |
| Others                            | 7 (3.66%)    | 4 (57.14)   | 3 (42.86)   |         |
| Education                         |              |             |             | 0.004*  |
| No studies                        | 54 (15.98%)  | 36 (66.67)  | 18 (33.33)  |         |
| Primary studies                   | 74 (21.89%)  | 45 (60.81)  | 29 (39.19)  |         |
| Secondary studies                 | 130 (38.46%) | 70 (53.85)  | 60 (46.15)  |         |
| Higher education                  | 80 (23.67%)  | 30 (37.50)  | 50 (62.50)  |         |
| Occupation                        |              |             |             | <0.001* |
| Active                            | 206 (60.95%) | 128 (62.14) | 78 (37.86)  |         |
| Retired                           | 23 (6.80%)   | 17 (73.91)  | 6 (26.09)   |         |
| Student                           | 29 (8.58%)   | 16 (55.17)  | 13 (44.83)  |         |
| Unemployed                        | 80 (23.67%)  | 20 (25.00)  | 60 (75.00)  |         |
| Marital status                    |              |             |             | 0.001*  |
| Single                            | 156 (46.15%) | 101 (64.74) | 55 (35.26)  |         |
| Married                           | 150 (44.38%) | 66 (44.00)  | 84 (56.00)  |         |
| Divorced                          | 25 (7.40%)   | 12 (48.00)  | 13 (52.00)  |         |
| Widower                           | 7 (2.07%)    | 2 (53.55)   | 5 (71.43)   |         |
| Cohabiting with vulnerable person |              |             |             | 0.108   |
| No                                | 275 (81.36%) | 153 (55.64) | 122 (44.36) |         |



|                                           |              |             |             |         |
|-------------------------------------------|--------------|-------------|-------------|---------|
| Yes                                       | 63 (18.64%)  | 28 (44.44)  | 35 (55.56)  |         |
| Cohabiting vulnerable person vaccinated   |              |             |             | 0.615   |
| No                                        | 18 (26.09%)  | 9 (50.00)   | 9 (50.00)   |         |
| Yes                                       | 51 (73.91%)  | 22 (43.14)  | 29 (56.86)  |         |
| Children                                  |              |             |             | <0.001* |
| No                                        | 161 (47.63%) | 111 (68.94) | 50 (31.06)  |         |
| Yes                                       | 177 (52.37%) | 70 (839.55) | 107 (60.45) |         |
| Children with vaccines covered by the NPI |              |             |             | <0.001  |
| No                                        | 16 (9.04%)   | 13 (81.25)  | 3 (18.75)   |         |
| Yes                                       | 161 (90.96%) | 57 (35.40)  | 104 (64.60) |         |
| Children non-insurance-covered vaccines   |              |             |             | 0.709   |
| No                                        | 109 (63.01%) | 44 (40.37)  | 65 (59.63)  |         |
| Yes                                       | 64 (36.99%)  | 24 (37.50)  | 40 (62.50)  |         |
| Flu vaccine in 21-22 campaign             |              |             |             | 0.248   |
| No                                        | 300 (88.76%) | 164 (54.67) | 136 (45.33) |         |
| Yes                                       | 38 (11.24%)  | 17 (44.74)  | 21 (55.26)  |         |
| Flu vaccine in previous campaign          |              |             |             | 0.094   |
| No                                        | 278 (82.25%) | 143 (51.44) | 135 (48.56) |         |
| Yes                                       | 60 (17.75%)  | 38 (63.33)  | 22 (36.67)  |         |

SD: Standard deviation.

**Table S3.** COVID-19-related variables included in the second part of the survey.

|                                   | Variable                               | n(%)<br>Mean(SD)     | n(%)<br>Mean (SD) |               | p<br>Chi2/StudentT/<br>Mann-<br>Whitney |
|-----------------------------------|----------------------------------------|----------------------|-------------------|---------------|-----------------------------------------|
|                                   |                                        | Total<br>sample: 338 | Men               | Woman         |                                         |
| COVID-19-<br>related<br>variables | Suffered from COVID-19                 |                      |                   |               | 0.438                                   |
|                                   | No                                     | 197 (58.28%)         | 109<br>(55.33)    | 88<br>(44.67) |                                         |
|                                   | Yes                                    | 141 (41.72%)         | 72<br>(51.06)     | 69<br>(48.94) |                                         |
|                                   | COVID-19 before first vaccine          |                      |                   |               | 0.105                                   |
|                                   | Before                                 | 129 (92.14%)         | 68<br>(52.71)     | 61<br>(47.29) |                                         |
|                                   | After                                  | 11 (7.86%)           | 3<br>(27.27)      | 8 (72.73)     |                                         |
|                                   | COVID-19 that required hospitalization |                      |                   |               | 0.952                                   |
|                                   | No                                     | 124 (88.57%)         | 63<br>(50.81)     | 61<br>(49.19) |                                         |
|                                   | Yes                                    | 16 (11.43%)          | 8<br>(50.00)      | 8 (50.00)     |                                         |
|                                   | COVID-19 that required ICU             |                      |                   |               | 0.17                                    |
|                                   | No                                     | 132 (94.29 %)        | 66<br>(50.00)     | 66<br>(50.00) |                                         |

|                                                 |              |                |                |        |
|-------------------------------------------------|--------------|----------------|----------------|--------|
| Yes                                             | 8 (5.71%)    | 6<br>(75.00)   | 2 (25.00)      |        |
| Sequels from COVID-19                           |              |                |                | 0.045* |
| No                                              | 111 (78.17%) | 62<br>(55.86)  | 49<br>(44.14)  |        |
| Yes                                             | 31 (21.83%)  | 11<br>(35.48)  | 20<br>(64.52)  |        |
| Confined because of COVID-19                    |              |                |                | 0.305  |
| No                                              | 1 (0.71%)    | 0 (0.00)       | 1<br>(100.00)  |        |
| Yes                                             | 140 (99.29%) | 72<br>(51.43)  | 68<br>(48.57)  |        |
| Close contact got COVID-19                      |              |                |                | 0.328  |
| No                                              | 97 (28.70%)  | 56<br>(57.73)  | 41<br>(42.27)  |        |
| Yes                                             | 241 (71.30%) | 125<br>(51.87) | 116<br>(48.13) |        |
| Close contact required COVID-19 hospitalization |              |                |                | 0.102  |
| No                                              | 191 (79.25%) | 105<br>(54.97) | 86<br>(45.03)  |        |
| Yes                                             | 50 (20.75%)  | 21<br>(42.00)  | 29<br>(58.00)  |        |
| Close contact required ICU because of COVID-19  |              |                |                | 0.976  |
| No                                              | 220 (92.05%) | 115<br>(52.27) | 105<br>(47.73) |        |
| Yes                                             | 19 (7.95%)   | 10<br>(52.63)  | 9 (47.37)      |        |
| Close contact had recurring COVID-19 infection  |              |                |                | 0.027* |
| No                                              | 202 (84.52%) | 111<br>(54.95) | 91<br>(45.05)  |        |

|                                                                |                                       |              |                |                |       |
|----------------------------------------------------------------|---------------------------------------|--------------|----------------|----------------|-------|
|                                                                | Yes                                   | 37 (15.48%)  | 13<br>(35.14)  | 24<br>(64.86)  |       |
| Close contact survived COVID-19                                |                                       |              |                |                |       |
|                                                                | No                                    | 28 (11.86%)  | 15<br>(53.57)  | 13<br>(46.43)  |       |
|                                                                | Yes                                   | 208 (88.14%) | 106<br>(59.96) | 102<br>(49.04) |       |
| Compliance with barrier gesture<br>"greetings without contact" |                                       |              |                |                |       |
|                                                                | No                                    | 112 (33.14)  | 66<br>(58.93)  | 46 (41<br>.07) | 0.163 |
|                                                                | Yes                                   | 226 (66.86%) | 115<br>(50.88) | 111<br>(49.12) |       |
| Abandon barrier gesture                                        |                                       |              |                |                |       |
|                                                                | No                                    | 117 (49.79%) | 59<br>(50.43)  | 58<br>(49.57)  | 0.948 |
|                                                                | Yes                                   | 118 (50.21%) | 59<br>(50.00)  | 59<br>(50.00)  |       |
| When did you abandon barrier<br>gestures                       |                                       |              |                |                |       |
|                                                                | Since I got the vaccine               | 12 (10.00%)  | 7<br>(58.33)   | 5 (41.67)      | 0.962 |
|                                                                | Since they got the vaccine            | 7 (5.83%)    | 4<br>(57.14)   | 3 (42.86)      |       |
|                                                                | Since COVID-19 incidence<br>decreased | 81 (67.50%)  | 42<br>(57.14)  | 39<br>(48.15)  |       |
|                                                                | Others                                | 20 (16.67%)  | 10<br>(50.00)  | 10<br>(50.00)  |       |

SD: Standard deviation.

**Table S4.** Data form self-perceived risk, vaccine security perception and FCV 19-S score (parts 3, 4 and 5 of the survey).

| Variable            |                                                                                                       | n(%)<br>Mean(SD)     | n(%)<br>Mean(SD) |              | p<br>Chi2/StudentT/<br>Mann-<br>Whitney |
|---------------------|-------------------------------------------------------------------------------------------------------|----------------------|------------------|--------------|-----------------------------------------|
|                     |                                                                                                       | Total<br>sample: 338 | Men              | Women        |                                         |
| Self-perceived risk | COVID-19 vaccine makes me feel safer at work                                                          | 3.23 (1.45)          | 3.14 (1.45)      | 3.34 (1.44)  | 0.1922                                  |
|                     | COVID-19 vaccine helps me protect my family                                                           | 3.55 (1.38)          | 3.56 (1.40)      | 3.54 (1.35)  | 0.8001                                  |
|                     | COVID-19 vaccine makes me feel comfortable with my family                                             | 3.47 (1.38)          | 3.44 (1.39)      | 3.49 (1.37)  | 0.7456                                  |
|                     | COVID-19 vaccine will decrease my risk of getting COVID-19                                            | 3.39 (1.40)          | 3.39 (1.36)      | 3.38 (1.43)  | 0.8726                                  |
|                     | COVID-19 vaccine will decrease the risk of hospitalization                                            | 3.62 (1.25)          | 3.53 (1.25)      | 3.73 (1.25)  | 0.0799                                  |
|                     | Self-perceived risk total                                                                             | 17.25 (5.96)         | 17.05 (6.06)     | 17.49 (5.86) | 0.4447                                  |
| Vaccine security    | Approved COVID-19 vaccines are safe                                                                   | 3.27 (1.17)          | 3.29 (1.81)      | 3.24 (1.62)  | 0.7125                                  |
|                     | COVID-19 vaccine adverse events are similar to those of other vaccines                                | 3.21 (1.23)          | 3.30 (1.11)      | 3.30 (1.16)  | 0.9934                                  |
|                     | The need for a COVID-19 certificate in bars and restaurants has been a reason for getting the vaccine | 3.25 (1.24)          | 3.21 (1.23)      | 3.29 (1.26)  | 0.5403                                  |

|                                                      |              |              |              |         |
|------------------------------------------------------|--------------|--------------|--------------|---------|
| I trust Drug Agencies' work                          | 3.46 (1.08)  | 3.43 (1.11)  | 3.50 (1.05)  | 0.5104  |
| I trust Health Authorities' recommendations          | 3.86 (1.16)  | 3.80 (1.19)  | 3.92 (1.14)  | 0.3287  |
| COVID-19 vaccine benefits are greater than risks     | 3.55 (1.15)  | 3.56 (1.15)  | 3.54 (1.15)  | 0.9856  |
| Vaccine security total                               | 20.68 (4.54) | 20.58 (4.58) | 20.80 (4.41) | 0.5933  |
| I am afraid of COVID-19                              | 2.05 (1.30)  | 1.88 (1.19)  | 2.25 (1.40)  | 0.0130* |
| I feel uncomfortable when thinking about COVID-19    | 1.76 (1.14)  | 1.61 (1.00)  | 1.93 (1.27)  | 0.0276  |
| My hands sweat when I think about COVID-19           | 1.24 (0.70)  | 1.18 (0.52)  | 1.30 (0.87)  | 0.927   |
| I am afraid of dying from COVID-19                   | 1.62 (1.13)  | 1.49 (0.96)  | 1.76 (1.27)  | 0.1268  |
| FCV 19-S                                             |              |              |              |         |
| I get nervous listening to news about COVID-19       | 1.63 (1.11)  | 1.46 (0.92)  | 1.83 (1.27)  | 0.0164* |
| I cannot sleep because of COVID-19                   | 1.20 (0.61)  | 1.17 (0.58)  | 1.23 (0.64)  | 3153    |
| My heart accelerates when I think I can get COVID-19 | 1.22 (0.69)  | 1.17 (0.55)  | 1.27 (0.81)  | 0.4477  |
| FCV 19-S total                                       | 10.71 (5.26) | 9.96 (4.43)  | 11.57 (5.99) | 0.0044* |

FCV 19-S: Fear of COVID-19 Scale; SD: Standard deviation.

**Table S5.** Bivariate analysis by reason for vaccination (COVID-19-related variables).

|                            | Variable                          | n%<br>mean (SD)    |                | p<br>Chi2/StudentT/<br>Mann-Whitney |
|----------------------------|-----------------------------------|--------------------|----------------|-------------------------------------|
|                            |                                   | Non-Health-related | Health-related |                                     |
| COVID-19-related variables | Suffered from COVID-19            |                    |                | 0.332                               |
|                            | No                                | 98 (59.76)         | 66 (40.24)     |                                     |
|                            | Yes                               | 57 (53.77)         | 49 (46.23)     |                                     |
|                            | COVID-19 before first vaccine     |                    |                | 0.514                               |
|                            | Before                            | 53 (53.00)         | 47 (47.00)     |                                     |
|                            | After                             | 4 (66.67)          | 2 (33.33)      |                                     |
|                            | COVID-19 required hospitalization |                    |                | 0.067                               |
|                            | No                                | 53 (56.38)         | 41 (43.62)     |                                     |
|                            | Yes                               | 3 (27.27)          | 8 (72.73)      |                                     |
|                            | COVID-19 required ICU             |                    |                | 0.157                               |
|                            | No                                | 55 (56.12)         | 43 (43.87)     |                                     |
|                            | Yes                               | 2 (28.57)          | 5 (71.43)      |                                     |
|                            | Recurring COVID-19 infection      |                    |                | 0.16                                |
|                            | No                                | 49 (57.65)         | 36 (42.35)     |                                     |
|                            | Yes                               | 9 (40.91)          | 13 (59.09)     |                                     |
|                            | Confined because of COVID-19      |                    |                | 0.279                               |
|                            | No                                | 0 (0.00)           | 1 (100.00)     |                                     |
|                            | Yes                               | 57 (54.29)         | 48 (45.71)     |                                     |

|                                                            |             |            |        |
|------------------------------------------------------------|-------------|------------|--------|
| Close contact got COVID-19                                 |             |            | 0.925  |
| No                                                         | 48 (57.83)  | 35 (42.17) |        |
| Yes                                                        | 107 (57.22) | 80 (42.78) |        |
| Close contact required hospitalization because of COVID-19 |             |            | 0.099  |
| No                                                         | 90 (60.81)  | 58 (39.19) |        |
| Yes                                                        | 18 (46.15)  | 21 (42.25) |        |
| Close contact required ICU because of COVID-19             |             |            | 0.256  |
| No                                                         | 100 (58.48) | 71 (41.52) |        |
| Yes                                                        | 6 (42.86)   | 8 (57.14)  |        |
| Close contact had recurring COVID-19 infection             |             |            | 0.051  |
| No                                                         | 95 (60.90)  | 61 (39.10) |        |
| Yes                                                        | 12 (41.38)  | 17 (58.62) |        |
| Close contact survived COVID-19                            |             |            | 0.586  |
| No                                                         | 15 (62.50)  | 9 (37.59)  |        |
| Yes                                                        | 90 (56.60)  | 69 (43.40) |        |
| Compliance with "greetings without contact"                |             |            | 0.007* |
| No                                                         | 62 (68.89)  | 28 (31.11) |        |
| Yes                                                        | 93 (51.67)  | 87 (48.33) |        |
| Abandoned barrier gesture                                  |             |            | 0.238  |
| No                                                         | 47 (49.47)  | 48 (50.53) |        |
| Yes                                                        | 54 (58.06)  | 39 (41.94) |        |
| When did you abandon barrier gestures                      |             |            | 0.632  |
| Since I got the vaccine                                    | 6 (66.67)   | 3 (33.33)  |        |



---

|                                          |            |            |
|------------------------------------------|------------|------------|
| Since they got the vaccine               | 3 (60.00)  | 2 (40.00)  |
| Since incidence of COVID-19<br>decreased | 39 (58.21) | 28 (41.79) |
| Others                                   | 10 (76.92) | 3 (23.08)  |

---

SD: Standard deviation.
